# 1 A scoping review of the “at-risk” student literature in 2 higher education

3 **Colin Chibaya** <sup>1,\*,¶</sup>, **Albert Whata** <sup>2,\*,¶</sup>, **Kudakwashe Madzima** <sup>1,\*,¶</sup>, **Godfrey Rudolph** <sup>3,α</sup>, **Silas Verkijika** <sup>1,α</sup>, **Lucky**  
4 **Makhoere** <sup>1,α</sup>, **Moeketsi Mosia** <sup>3,α</sup>

5 <sup>1</sup> Department of Computer Science & Information Technology, Sol Plaatje University, Kimberley, South Africa

6 <sup>2</sup> Department of Mathematical and Computer Sciences, Sol Plaatje University, Kimberley, South Africa

7 <sup>3</sup> Centre for Teaching, Learning, and Programme Development, Sol Plaatje University, Kimberley, South Africa

8 \* Corresponding authors: [colin.chibaya@spu.ac.za](mailto:colin.chibaya@spu.ac.za); [albert.whata@spu.ac.za](mailto:albert.whata@spu.ac.za); [kudakwashe.madzima@spu.ac.za](mailto:kudakwashe.madzima@spu.ac.za)

9 ¶ These authors contributed most and equally to this article.

10 α These authors contributed, verified, reviewed, and proofread this article.

## 11 Abstract

12 Institutions' inclination to fulfilling the mandate of producing quality graduates is overwhelming. Insistent petition for  
13 institutions to understand their students is about creating equitable opportunities for the diverse student bodies. However, "at-  
14 risk" students ubiquitously co-exist. This article conducted a scoping review of literature published locally and internationally  
15 that sought to understand "at-risk" students in higher education. The study examined the aims, participants, variables, data  
16 analytics tools, and the methods used when the topic on "at-risk" students is studied. Broadly, we sought the bigger picture of  
17 what matters, where, when, why, and how so. The Population, Concept, and Context (PCC) framework was considered for  
18 demarcating appropriate literature for the *concept* and *context* of "at-risk" students. The JBI protocol was chosen for selecting  
19 relevant literature published between 2010 and 2022, searched from the EBSCOhost and ScienceDirect databases. A search  
20 tool was developed using the *litsearchr* R package and screening proceeded guided by the PRISMA framework. Although 1961  
21 articles were obtained after applying the search criteria, 84 articles satisfied the stipulated inclusion criteria. Although Africa  
22 is lagging, research on "at-risk" students is exponentially growing in America, Europe, and Asia. Notably, relevant articles use  
23 academic data to understand students at risk of dropping-out or failing in the first year. Often, statistical and machine learning  
24 methods were preferred. Most factors that determined whether a student is at risk of failing or dropping out were found to be  
25 highly correlated with high school knowledge. Also, being "at-risk" connoted one's geographical context, ethnicity, gender,  
26 and academic culture. It was noted that autonomously motivated students, with good time management, succeed. Ideally,  
27 institutions need to identify areas that need intervention, including courses where special tutoring programmes are needed.  
28 Institutions should detect staff who need further training. Nonetheless, psychosocial well-being programmes should augment  
29 institutional investments to improve students' success. Precisely, institutional environments should be stimulating, conducive,  
30 and motivating.

31 **Keywords:** scoping review, "at-risk" student, dropout, stop-out, burn out, failing, data analytics tools, methods, intervention

## 32 Introduction

33 Research on "at-risk" students requires one to holistically comprehend this key term, "at-risk" student. Furthermore, it is  
34 necessary to conduct an in-depth scoping review of this knowledge domain. This is because the term "at-risk" student should  
35 be contextualized and grounded in the factors that distinguish such students from the rest. That understanding may allow

36 institutions to better prepare for new student cohorts in terms of both the necessary resources and infrastructure. At the same  
37 time, that understanding may also provide clearer criteria for inclusion and exclusion of the literature that may propel further  
38 research in this knowledge domain. Additionally, a broad understanding of the term, “at-risk” student, may potentially provide  
39 hints on the appropriate search strategies for related literature, as well as elucidating apt mechanisms for screening suitable  
40 studies for the scoping review. In this context, a scoping review is about the synthesis of research that aims to map literature  
41 on a topic to the identification of the population of articles, the key concepts, and the context of the knowledge domain thereof  
42 [1]. Correspondingly, scoping reviews explicate the evident gaps in the knowledge domain while pinpointing the common  
43 characteristics of the evidence thereto, towards informing practice and policymaking.

44 Our understanding of an “at-risk” student is that of one who would likely dropout, stop-out, burn out, or fail to  
45 complete a study programme [3] in higher education. In this context, a dropout is a student who permanently quits from studies  
46 without attaining the intended qualification [9]. On the other hand, a stop-out is a student who temporarily discontinues studies  
47 with the hope of re-registering at a later stage [9]. Contrary, burning-out is a situation where a student responds to chronic stress  
48 through emotional and physical exhaustion characterized by low productivity [14]. Then, failing is a situation where a student  
49 endures through a study programme, however, without achieving the desired performance to pass [9]. Understanding the broad  
50 literature that characterizes “at-risk” students may inspire focused research for students’ success.

51 The higher education literature continues to emphasize early intervention as the preeminent way to save “at-risk”  
52 students. Evidence is available to support the premise that identifying an “at-risk” student early simplifies the identification of  
53 the barriers which the student needs to overcome [2]. In fact, the implementation of individualized support programmes  
54 increases the probability of student success, especially when the causal factors for being at risk are correctly identified in time.  
55 More so, use of individualized support programmes such as student counselling or peer tutoring allows the sharing of “at-risk”  
56 students’ specific risk information which can facilitate proper and timely intervention [39] at a lower cost [40]. As a result,  
57 when attempting to understand “at-risk” students, the focus should be on getting to know the student before attempting to solve  
58 the underlying challenges. Although direct intervention programmes dominate the list of remedies for being at risk, some  
59 literature connotes indirect interventions as tantamount as well, such as the need for the proper sequencing of courses and  
60 logical arrangement of the content covered in the courses that put students at risk [41]. Although indirect intervention influences  
61 the performance of students, especially in Science, Technology, Engineering, and Mathematics (STEM) degrees [41], proper  
62 intervention follows appropriate identification of the main causes of students being at risk. Prevalently, the following categories  
63 of indicators are insinuated in higher education; (a) low pre-entry marks [14], poor grade point average [17], muffled interview

64 scores [18], (b) prior experience [17], prior acquaintance with the chosen programme and career goals [19], or prior intention  
65 to dropout [21], (c) dwindling performance in tests [17, 38], negative behaviour [21], extended exhaustion levels [19], the  
66 general extent of satisfaction with education [21], little effort exerted on tasks [21], poor study skills, as well as poor attendance  
67 [11] and participation in class [20]. Other factors that mildly feature when the topic of “at-risk” students is raised include lack  
68 of student support strategies [17] at institutional levels, students’ demographics [17], resource allocation [33, 38] at institutional  
69 levels, other educational barriers [13], emotional intelligence [34, 35], and learning behaviour [36, 37] of the student.  
70 Institutional strategic plans [24, 25, 28] and decision-making approaches [24] are also singled out. It is alluded that institutions  
71 that lack proper strategic planning veiledly marginalize [13] and stigmatize [26] “at-risk” students.

72           Given the propensity to boost student success rates, and the potential benefits of proactive identification of “at-risk”  
73 students, most institutions are shifting focus to students’ data for insights. It is our hope that reframing and expanding the  
74 concept of an “at-risk” student from data and gaining a better understanding of the underlying scope of work in this knowledge  
75 domain would create equitable opportunities for students while also advancing institutional roles in effectively addressing the  
76 elements that put students at risk. This scoping review synthesizes research evidence within the “at-risk” student knowledge  
77 domain with the goal of mapping the broad concepts to the likely intervention, emphasizing variabilities in the quoted aims,  
78 research design strategies, the population of participants, methodological standards, and the reported findings. An especially  
79 important point to note is an attempt to fully understand the data upon which the evidence provided is based.

## 80 **Objectives**

81           Three objectives summarize this scoping review in the sequence they are presented as follows: (a) We want to identify  
82 articles that present prevalent categories of “at-risk” students in the higher education context. (b) We also want to investigate  
83 the prevalent aims, data analytics tools, common participants, variables, and methods insinuated when the topic of “at-risk”  
84 students is being studied. Last, (c) we want to analyze the articles that meet the inclusion criteria to obtain a broader picture of  
85 what matters, where, when, why, and how the problem of the “at-risk” student has been tackled in the past. Achievement of  
86 these objectives may give insights to guide further studies aimed at bringing about change and social justice in higher education.

## 87 **Research questions**

88           Three questions are asked in line with the objectives as follows; (a) Which articles tackled the “at-risk” student  
89 problem in the higher education context? (b) What were the aims, data analytics tools, participants, variables, and methods

90 used in tackling the problem? (c) What mattered, where, when, why, and how was the “at-risk” student problem addressed?  
91 Hopefully, answers to these questions may provide intuition into further research to guide practices and propel data-driven  
92 institutional planning.

## 93 **Overview**

94 The rest of the article proceeded as follows; a section on how the PCC framework fits into this study follows next.  
95 The PCC framework guides the selection of the *population* of articles that befit the *concept* and *context* of the study. The  
96 methods we followed in completing the study are presented thereafter, emphasizing the inclusion and exclusion criteria, search  
97 strategy, screening procedure, and how the summaries were drawn. Subsequently, the results which report the distribution of  
98 articles followed before the conclusion highlighted the contributions and direction for further studies.

## 99 **The PCC framework**

100 This scoping review categorized articles on the “at-risk” student in higher education. An appropriate search strategy  
101 for articles published on this topic was proposed. In this case, we adopted an a priori model known as the PCC (*Population*,  
102 *Concept*, and *Context*) framework [31], asking the following question: “Which literature seeks to understand the “at-risk”  
103 student knowledge domain in the higher education context?”. This PCC framework shows a plan for what matters [31] in an  
104 open *population* of articles. It would imply that all articles that mention the *concept* of an “at-risk” student may be included.  
105 However, the inclusion criteria define the boundary of articles that fit into the desired *population*, *concept*, and *context* of the  
106 study. Precisely, the key *concept* remained the “at-risk” student. This is a broad concept that could cover any kind of articles  
107 that mention the term, “at-risk” student. However, the PCC framework was used to contextualize the *concept* of “at-risk”  
108 students through a clearly defined search strategy that stipulated how the relevant articles were selected and screened, bearing  
109 in mind the higher education setting. Also, the *concept* of an “at-risk” student has been left open regarding the sources of  
110 evidence, which may come from anywhere, including the articles where students may be at risk of dropping-out, stopping-out,  
111 burning-out, or failing. This scoping review demarcated the *concept* of an “at-risk” student to comprise dropouts, stop-outs,  
112 burn outs, and failing students in the higher education perspective. The methods section will meticulously elucidate the  
113 *population* and the type of evidence considered in characterizing the *concept* and *context* of this study. Anticipated results were  
114 reported using figures and charts that depict the distribution of articles categorized by year, region, aim, participants, methods,  
115 data analytics tools, and findings.

## 116 **Methods**

117           The inclusion and exclusion criteria, search strategy, method for screening articles, and the ways in which results are  
118 summarized are the main sub-sections of this section. The ethical considerations undertaken before the start of this study are  
119 also discussed to justify the integrity of the work.

### 120 **Inclusion and exclusion criteria**

121           The Joanna Briggs Institute (JBI) scoping review protocol [8, 31] was adopted, where articles with the keywords such  
122 as intervention, at-risk, failing, dropout, stop-out, burn out, performance, and success were nominated to define the *population*  
123 of articles for this scoping review. The key *concept* remained the term “at-risk” student. Conversely, the *context* was persistently  
124 about the characterization of students at risk of dropping out, stopping out, burning out, or failing in higher education. In this  
125 case, higher education refers to university and college education. The literature looked at academic performance as one of the  
126 most important factors in determining success [27]. The *population* of the articles comprised peer-reviewed conference and  
127 journal articles. Only articles that were published in English were considered in this scoping review. A literature search was  
128 conducted in the EBSCOhost and ScienceDirect online databases, soliciting articles published between 2010 and 2022.. The  
129 deep inner type of the study was not of interest. Therefore, review articles, conceptual papers, theoretical articles, as well as  
130 empirical quantitative and qualitative studies all qualified. An iterative approach which allowed repeated refinement of the  
131 inclusion and exclusion criteria was adopted. Thus, articles went through several iterated screening rounds before the final list  
132 of relevant literature was generated. Disputed articles were considered through consensus after round robin reviews by the  
133 research team members. Sometime, detailed manual scrutiny of the full texts of the articles were considered as the last resort.

### 134 **Search strategy**

135           A three-step search strategy was employed. First, we employed the *litsearchr* R package [28] as a tool to facilitate a  
136 quick, objective, and reproducible search using text-mining and keyword co-occurrence networks [28]. This approach reduced  
137 possible bias in the search by removing the reliance on predetermined factors. The tool improved search recall by exploiting  
138 the identification of synonymous terms that research team members would otherwise miss. Also, it took away the likely bias  
139 of researchers typically selecting keywords based on their own knowledge without specifying how the search process was

140 administered [10]. Such bias would instigate irreproducibility because it would be hard to recall the procedure followed in each  
141 selection of a comprehensive set of concepts. The following search query was used to mine the relevant articles.

142 *(students AND at-risk AND (failing OR stop out OR burn out OR dropout) AND (university OR college))*

143 The validity of this search query was verified with the help of an experienced librarian. Consultations with content experts in  
144 the field of student success were also considered to triangulate the search strategy, as well as to enhance rigour and reliability.  
145 In this case, content experts were a valuable resource for finding literature that was hard to identify through other means. The  
146 second step was about the actual search process, where the search query was executed following the directions from content  
147 experts. The final step focused on scrutinizing the list that passed the inclusion criteria for any outstanding patterns.

## 148 **Screening of included articles**

149 The standard procedure to verify scientific material is through manual screening. Generally, such screening can be  
150 split into several steps, including screening articles by titles, screening by abstracts, or screening by physically going through  
151 the full text. The *revtools* [16] R package that supports evidence synthesis was considered for the first round of screening. This  
152 tool de-duplicates bibliographic data using titles and abstracts. It also visualizes articles using topic models, allowing articles  
153 to be screened by removing duplications arising from using different search strategies. In using the *revtools* R package, we  
154 were guided by the PRISMA-ScR framework [15]. PRISMA stands for Preferred Reporting Items for Systematic reviews and  
155 Meta-Analyses [15] while ScR is an acronym for Scoping Review. The PRISMA framework facilitated the construction of a  
156 flow diagram that shows how screening was undertaken through the different stages of the scoping review, reporting the articles  
157 considered and those excluded, together with the reasons for the exclusion.

## 158 **Summaries**

159 A standardized data extraction template that followed the PRISMA-ScR format was created as part of the data charting  
160 process. We indicated that the *population* of articles that met the inclusion criteria for the *concept* of the “at-risk” student in  
161 the *context* of failing, dropping-out, stopping-out, or burning-out in higher education, together with the details of those articles  
162 in terms of the year of publication, country, aim, participants, methodology, intervention, and findings, were the key results  
163 reported and analyzed in this scoping review. We mainly looked at the characteristics of these articles to establish likely  
164 knowledge gaps to explore further. We also sought the bigger picture of what matters, where, when, why, and how literature

165 tackled the “at-risk” student problem. Figures, charts, and tables were the main reporting tools [12] used because they better  
166 depict the gap maps in the knowledge domain under study.

## 167 **Ethical statement**

168 The research protocol for this study underwent approval by the Senate Research Ethics Committee of the Sol Plaatje  
169 University. The work was endorsed by the Directorate of the Centre for Teaching, Learning, and Programme Development.  
170 The larger project, from which this study ensued, is registered at the National Teaching Advancement Programme as an  
171 institutional project. Hopefully, the results from the project will instigate change and social justice in higher education and  
172 inform further research on good practices towards data-driven institutional planning and decision-making.

## 173 **Search Results**

174 Figure 1 shows the PRISMA-ScR flow diagram that summarizes the articles considered, included, and excluded. The PRISMA-  
175 ScR seeks to determine the articles that tackled the “at-risk” student problem in the higher education context (research question  
176 (a)). Precisely, 1918 articles that were extracted from the ScienceDirect and EBSCOhost databases using the proposed search  
177 query made it through the first round of inclusion. An additional 43 articles qualified through random search from the internet  
178 (28 articles), or from recommendations by content experts (3 articles), and citation search (12 articles). A total of 1961 articles,  
179 thus, formed the desired scoping review *population*. The initial screening process using the titles of the articles dropped 139  
180 articles because they had duplicate titles. Further screening using the abstracts excluded another five articles. Six more articles  
181 were discarded because their topics were not in line with the scope of the key *concept* and the *context* of the study. Therefore,  
182 the *population* of relevant articles dropped to 1768. The application of the *revtools* [16] R package eliminated the largest chunk  
183 (1560 articles) through topic modelling, title, and abstract screening. The remaining 220 articles were reviewed manually.  
184 However, the full texts for 53 of the 220 articles could not be retrieved, thus reducing the number of articles to 167 articles.  
185 These 167 articles were subjected to additional manual screening to check whether their content was in line with the concept  
186 of “at risk” students. Another 27 articles were discarded as their participants were not part of the higher education domain.  
187 Eleven articles were removed because they focused on the *context* of nursing students in nondegree-offering colleges. There  
188 are 6 non-English articles that were also removed. A further 13 articles were dropped because they focused on other *contexts*,



189 such as the risk of quitting or stopping medication or some other programs not related to education. The full-text reviews  
190 excluded another seven articles that were identified as duplicates that were missed by the *revtools* automated application tool.s.

#### PRISMA Flow diagram

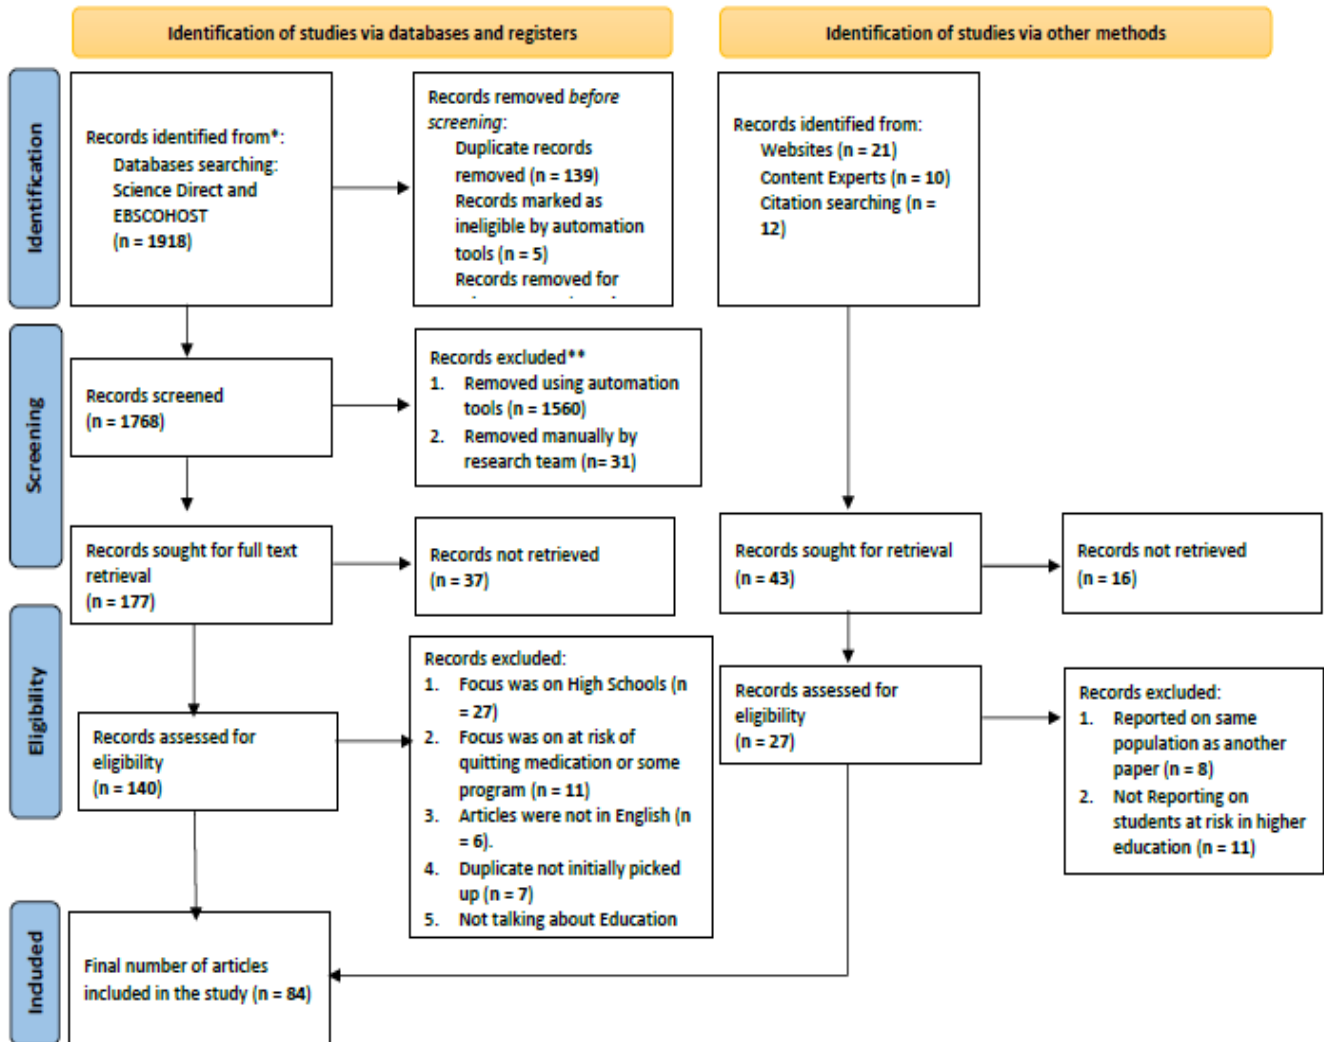

191

192 **Figure 1: PRISMA-ScR flow diagram**

193 Additionally, eight articles were eliminated because they reported on the same participants as reported in other articles under  
194 consideration. Finally, 11 articles were removed because they differed in their definition of “at-risk” students. Eventually, 84  
195 articles remained as reflected in Figure 1. These articles formed the basis of the findings, discussions, recommendations, and  
196 conclusions that are reported in this study.

## 197 Findings, Discussions, and Recommendations

198 Literature notes the prevalent factors/variables that determine whether a student is at-risk include marks [17, 18], prior  
199 learning experience and the student's prior intentions [17, 19, 21], pre-entry expectations [30], student's personal behaviour  
200 [11, 17, 20, 21, 38], and partly the social environment of the student [17]. Purportedly, the presence of these factors/variables  
201 likely suggests poor outcomes in the student's future [11]. It is also insinuated that an "at-risk" student would predominantly  
202 demonstrate challenges with internalization and externalization of learning content [11]. Even compelling is the observation  
203 that an "at-risk" student would surely require intervention programs for success [19]. Such interventions should dominantly  
204 revolve around peer mentorship, tutorship, group studies, and enhanced residence culture. Little is said regarding non-academic  
205 factors such as students' socio-economic factors, childhood experiences, or family careers [29].

206 Figure 2 is a snapshot of the popular terms used to characterize "at-risk" students, with the terms such as dropout,  
207 poor performance, at-risk, and success standing out. This observation is in line with the views that ensue from topic modelling  
208 of the dominant variables used to identify the top "trending topics" on the "at-risk" student.

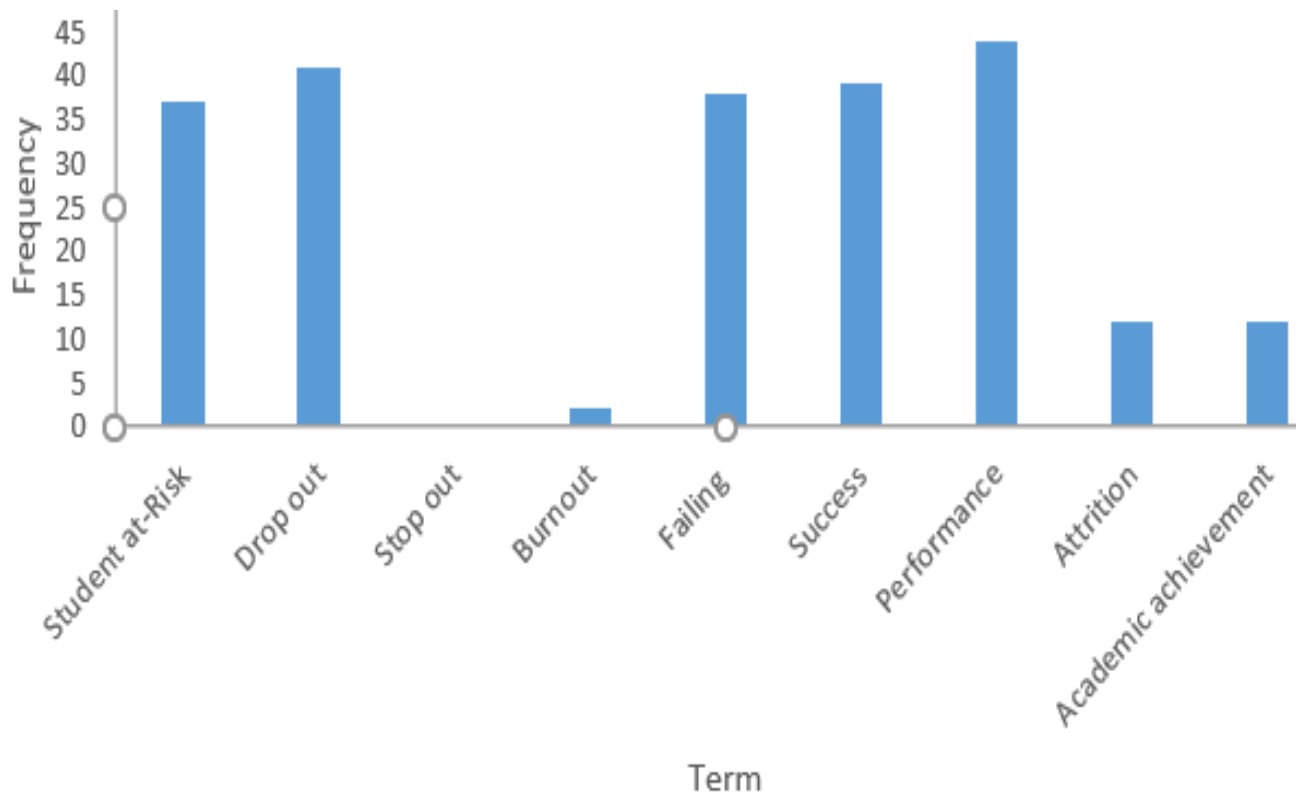

209

210 **Figure 2: Popularity of terms used in the context of "at-risk" students**

211

| Category              | (N = 84) | Factors/Variables                                                                                                                                                                                                                       |
|-----------------------|----------|-----------------------------------------------------------------------------------------------------------------------------------------------------------------------------------------------------------------------------------------|
| <b>Grades</b>         | 53.8     | Final exam grades, exam scores, major test marks, marks in formative tests, predicted grades, prior grades, grades in core courses, expected course grade, grade(s), secondary school grades, quiz scores, exam scores, homework scores |
| <b>Academic</b>       | 28.6     | Academic records, academic motivation, academic support, academic success, academic performance, academic background, academic integration                                                                                              |
| <b>Gender</b>         | 18.7     | Sex                                                                                                                                                                                                                                     |
| <b>GPA</b>            | 13.2     | GPA                                                                                                                                                                                                                                     |
| <b>Age</b>            | 12.1     | Age                                                                                                                                                                                                                                     |
| <b>Data</b>           | 11.0     | Learner and learning data, administrative data, enrolment data, activity data, trace data, records' system data, learning management data                                                                                               |
| <b>Course</b>         | 9.9      | Course code, course load, key courses, course observations, course non-completion, course credits, course status, Expected course grade, professor of the course, core courses                                                          |
| <b>Race/ethnicity</b> | 9.9      | Race, race/ethnicity                                                                                                                                                                                                                    |
| <b>Study</b>          | 7.7      | Study time, study skills, study program, field of study, study results, study group, work-study                                                                                                                                         |
| <b>Support</b>        | 7.7      | Educational support, peer support, parental support, family educational support, extra educational support                                                                                                                              |
| <b>Time</b>           | 7.7      | Interaction time with content, free time, time management, study time, travel time                                                                                                                                                      |
| <b>Semester</b>       | 6.6      | End of semester survey, semester enrolled,                                                                                                                                                                                              |
| <b>Scores</b>         | 5.5      | SAT scores, ACT scores, University Entry scores,                                                                                                                                                                                        |
| <b>Education</b>      | 5.5      | Prior education, education values, education system, prior schooling                                                                                                                                                                    |
| <b>Parent</b>         | 5.5      | Parent relationships, parent occupation, parent education                                                                                                                                                                               |

212 **Table 1: Top trending categories of the variables**

213

214

215

216

217

218

219

220

221

222

223

224

The research findings reported in this section sought to determine the aims, data analytics tools, participants, variables, and methods that were employed in the “at-risk” student’s literature. The aim(s) of most articles was to determine the factors/variables that cause a student to be at risk. Table 1 categorizes these top trending topics and factors/variables in the “at-risk” student’s literature. The summaries show that the included articles varied widely in terms of the terminology used to describe these dominant variables. For example, the category “Grades” included factors such as final exam grades, exam scores, major test marks, marks in formative tests, predicted grades, and prior grades. The category “Academic” included factors like academic record, academic motivation, academic support, academic success, academic performance, academic background, and academic integration. Literature indicates higher occurrences of the terms: Grades (53.8%), Academic (28.6%), Gender (18.7%), GPA (13.2%), Age (12.1%), Data (11%), Course (9.9%), Race/ethnicity (9.9%), Study (7.7%), Support (7.7%), Time (7.7%), Semester (6.6%), Scores (5.5%), Education (5.5%), and Parent (5.5%). This observation is consistent with the marks being a common factor of "at-risk" students [17, 18].

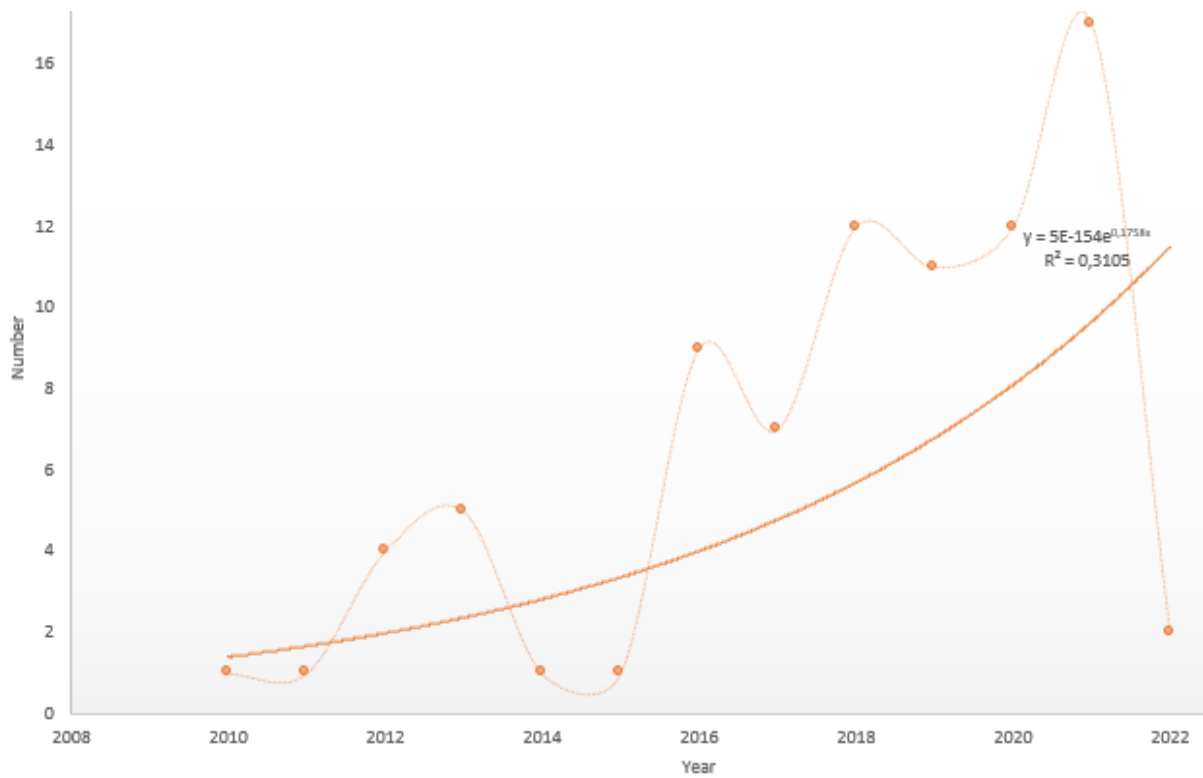

225

226

**Figure 3: Articles on the “at-risk” students that were published per year between the years 2010 and 2022**

227

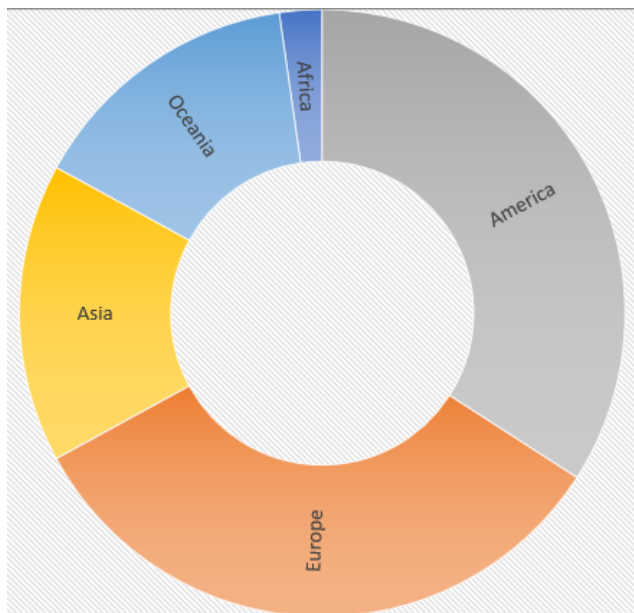

**Figure 4a: Distribution of articles by continent**

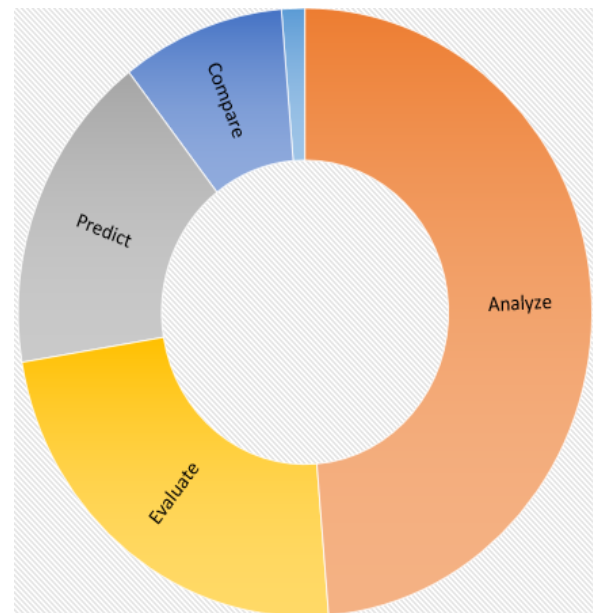

**Figure 4b: Distribution of articles by aim**

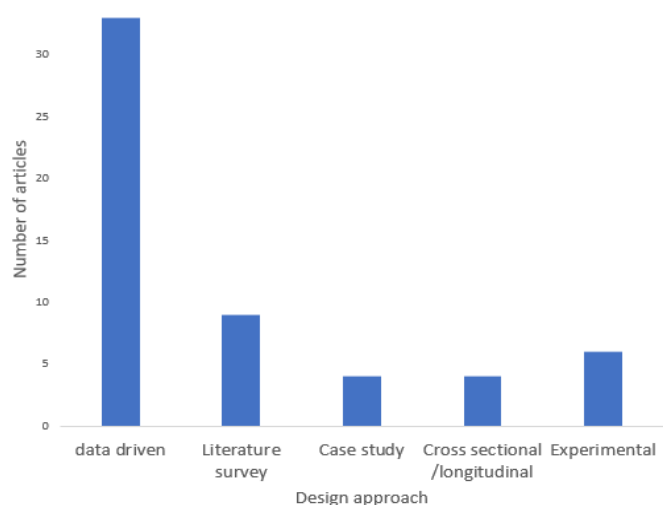

**Figure 4c: Distribution of articles by study design**

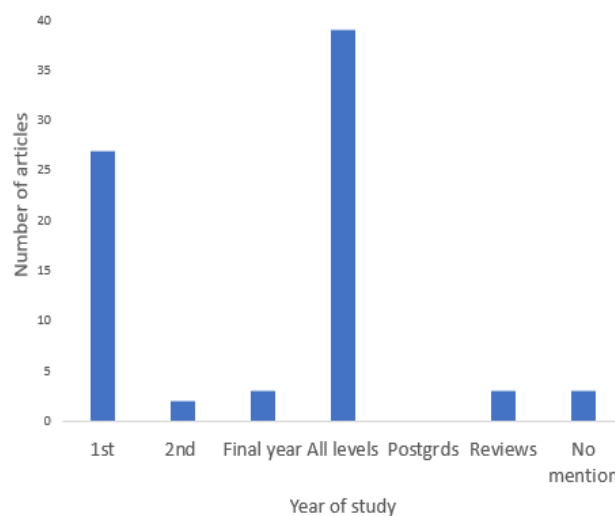

**Figure 4d: Distribution of articles by participant level**

228 On the other hand, Figure 3 depicts the distribution of the articles included in this scoping review that were published  
229 between the years 2010 to 2022. Generally, efforts to understand the “at-risk” student is exponentially growing. This growth  
230 may be attributed to the institutional goodwill earned from understanding students. Institutions that seek to understand their  
231 students often achieve good student success rates [17]. They plan better and make data-informed decisions. However, much  
232 attention to this bona fide agenda is, notably, visible around Europe, America, and Asia. Regions such as Africa are lagging  
233 (see Figure 4a), ostensibly calling for immediate attention.

234 Most articles included in this study emphasized data analysis to seek institutional advancement towards students’  
235 retention and success at undergraduate level. There is barely any literature on the “at-risk” student in post-graduate studies and  
236 that alone is a gap to explore further. First year students are the common target group of participants unless all students in the  
237 *context* were considered (see Figure 4d). This may be because cohorts of first year students often comprise the highest number  
238 of “at-risk” students. Another reason may be that the transition from high school to university is commonly perceived as radical,  
239 which renders first year students as indigent for support than senior students.

240 Equally, although a good chunk of literature focused on the building of predictive models to identify “at-risk” students,  
241 comparative studies to evaluate which model gives plausible outcomes are few (see Figure 4b). This may be because this  
242 knowledge domain is still in its infancy and such comparative studies may be upcoming. Nevertheless, data-driven methods  
243 are still preferred because of the insights drawn from several data-analytics tools. Studies that focused on surveys, case studies,  
244 experimental and cross-sectional research are also quite visible in the literature (see Figure 4c). However, advanced data-

245 analytics models are preferred for simplifying the way meanings can be drawn from the data collected from the many  
246 information systems institutions often subscribe to, and this will remain the likely trend in most related future studies. Such  
247 data analytics tools are summarized into four broad categories as shown in Figure 5.

248 Some articles employed more than one data analytics tool. Statistical methods were preferred most and were used for  
249 approximately 50 % of the time. Examples of statistical methods included survival analysis, confirmatory analysis, descriptive  
250 statistics, logistic regression, multiple linear regression, cox regression, and analysis of variance. On the other hand, machine  
251 learning methods are also quite dominant, employed for approximately 33% of the time. Some of the examples of the machine  
252 learning methods preferred include decision trees, artificial neural networks, naive Bayes, K-nearest neighbour, support-vector-  
253 machines (SVM), and different Ensemble methods. In addition, data mining techniques and qualitative methods also feature  
254 quite frequently (used for about 6 % and 12 % respectively).

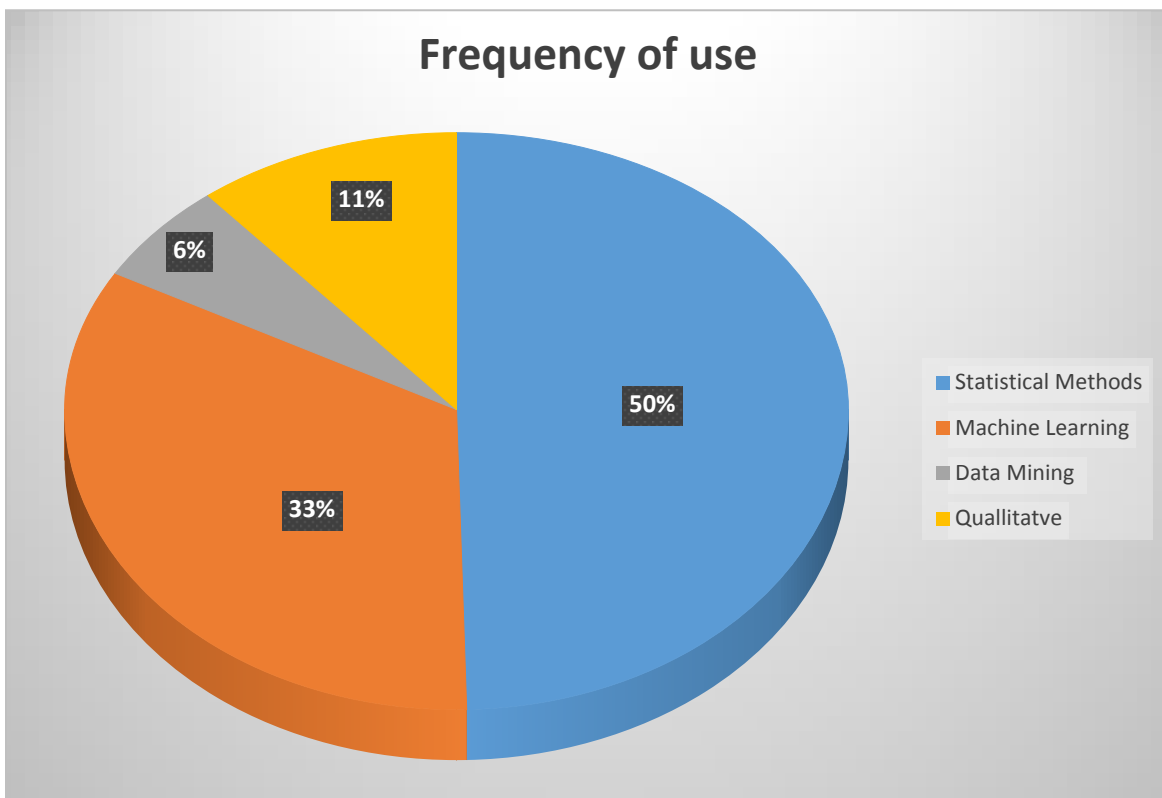

255

256 **Figure 5: Distribution of methods/data analytical tools used in the articles**

257 Several findings emanated from the scoping review regarding “at-risk” students. Generally, it is repeatedly insinuated  
258 that students will likely dropout if their secondary school knowledge was low or their motivation to study was low [42]. That  
259 intrinsic engagement reduces the chance of the burn out syndrome. Positive personality and commitment, coupled with

260 determinants of cognitive skills, attest the impact of that conscientiousness against dropping out. Autonomous motivation and  
261 good time management are positive predictors of achievement. High correlations are alluded between high school knowledge  
262 and dropout intention, satisfaction with education, academic exhaustion, and the student's expectations of graduation [4]. Low  
263 dropout rates were also linked to students who participated in social groups [43]. However, funding challenges then implicated  
264 the influence of geographical location and ethnicity as indicators of "at-risk" students.

265 Intervention close to individualized attention are seen as more effective, including peer tutoring and one-on-one  
266 counselling. Subscription to the use of early warning systems that reduce the burden of counseling, systems that will work  
267 towards enhancing metacognitive awareness, self-awareness, and self-regulation, as well as tracing logs by students on learning  
268 management systems may also simplify early prediction of "at-risk" students. Most compelling is the need for institutions to  
269 identify courses that are hard-to-pass and evaluate the question papers to determine the levels of difficulty. Lecturers should  
270 also implement student motivation strategies, including provision of timely feedback on assignments. Interventions that focus  
271 on the psychosocial well-being of students and the emotional intelligence of students are also recommended. Machine learning  
272 models such as AutoML can be adopted to formulate optimal student performance prediction models that use pre-start data.  
273 More interpretable models that provide educators with course feedback on student status are also recommended. Creation of  
274 caring, supportive, and welcoming environments within the university is critical to creating that sense of belonging.

## 275 **Gaps to explore**

276 The topic of "at-risk" student is receiving close attention. However, focus to the different arms of the *concept* of an  
277 "at-risk" student is not fairly spread. Emphasis is tilted towards interventions against dropping out or failing. Little is visible  
278 regarding students at risk of stopping-out or burning out and that is an apparent avenue for further studies in this body of  
279 knowledge. Similarly, most articles dwelt on the *concept* of an "at-risk" student in the *context* of dropping out or failing from  
280 American, European, or Asian institutions. Studies on this *concept* in African institutions' perspectives are rare. Research to  
281 compare the results yielded with the context of African institutions is worthwhile. Such studies may take us closer to the  
282 generalized understanding of an "at-risk" student beyond undergraduate levels. More so, literature suggests that students'  
283 internal states are also predictors of performance. Data about student's prior experiences, social interactions, relationships, and  
284 extracurricular activities is, thus, needed to further inform the understanding sought. A gap spins around investigating the use  
285 of non-academic data to define students' journeys [44]. Lastly, little is also said about the evaluation of the proposed  
286 interventions. Not much is known about the effectiveness of the interventions and that alone, is also a gap worth undertaking.

## 287 **Conclusion**

288           Unfolding the population of articles that characterize “at-risk” students guided the aims, participants, methods, variables,  
289 interventions, and data analytics tools one can adopt in related studies. Three contributions apparently stand out as follows:

- 290 •       The scoping review set forth an understanding of the *population of studies*, *concepts*, and *context* of the “at-risk” student.  
291       Institutions of higher learning can build on this understanding to similarly get to know their own diverse student bodies.
- 292 •       The scoping review elucidated various applications of different data analytics tools in understanding “at-risk” students.  
293       Tailored studies which suit particular scenarios may ensue.
- 294 •       Although the focus of this scoping review was on understanding the “at-risk” student in the higher education space, the  
295       results presented create a baseline context upon which a broader understanding of students, in general, may emanate.

296 A few challenges are observed from this scoping review as follows:

- 297 •       Although scoping reviews comprehensively synthesize evidence, dealing with a broad range of literature may blur  
298       important methodological steps which makes it difficult to establish boundaries.
- 299 •       A good scoping process requires more time and resources that are often difficult to predict at the start of the research.
- 300 •       Crafting an appropriately inclusive search query which would drop the number of screening iteration is hard.
- 301 •       Manually assessing the validity of some of the articles to be included when disputes arise is even harder.

302 Four ambitious directions for future work are envisioned as follows:

- 303 •       Investigations to corroborate the “at-risk” student knowledge domain to the African context are apparently overdue.
- 304 •       This scoping review could be enriched by extending the *context* of the study to accommodate other use cases.
- 305 •       Further research is paramount which analyzes trace data to better understand the broader spectrum of the enrolled student
- 306 •       It is worth checking the extensibility of the *concept* of “at-risk” students to include demographic and institutional aspects

## 307 **Acknowledgments**

308           This work was undertaken under the leadership of the DVC’s office, guided by the Centre for Teaching, Learning,  
309 and Programme Development of the Sol Plaatje University, supported by the Department of Higher Education and Training,  
310 through its University Capacity Development grant. We acknowledge their financial and moral support.



## 311 References

- 312 1. Pham, M.T; Rajic, A; Greig, J.D; Sargeant, J.M; Papadopoulos, A & McEwen, S. “A scoping review of scoping  
313 reviews: advancing the approach and enhancing the consistency”. In the journal on research synthesis methods, John  
314 Willey and Sons, Vol 5. 2014.
- 315 2. Merritt, S. M. (2021). Supporting at-risk nursing students to increase their final course grade. *Teaching and Learning  
316 in Nursing*, 16(1), 74-80.
- 317 3. Atif, A., Richards, D., Liu, D. and Bilgin, A.A., 2020. Perceived benefits and barriers of a prototype early alert system  
318 to detect engagement and support ‘at-risk’ students: The teacher perspective. *Computers & Education*, 156, p.103954.
- 319 4. Casanova, J.R., Gomes, C.M.A., Bernardo, A.B., Núñez, J.C. and Almeida, L.S., 2021. Dimensionality and reliability  
320 of a screening instrument for students at-risk of dropping out from higher education. *Studies in Educational Evaluation*,  
321 68, p.100957.
- 322 5. Smith, B. I., Chimedza, C., & Bührmann, J. H. (2021). Individualized help for at-risk students using model-agnostic  
323 and counterfactual explanations. *Education and Information Technologies*, 1-20.
- 324 6. Cattell, L., & Bruch, J. (2021). Identifying Students at Risk Using Prior Performance versus a Machine Learning  
325 Algorithm. REL 2021-126. Regional Educational Laboratory Mid-Atlantic.
- 326 7. Lakkaraju, H., Aguiar, E., Shan, C., Miller, D., Bhanpuri, N., Ghani, R., & Addison, K. L. (2015, August). A machine  
327 learning framework to identify students at risk of adverse academic outcomes. In *Proceedings of the 21th ACM  
328 SIGKDD international conference on knowledge discovery and data mining* (pp. 1909-1918).
- 329 8. Peters, M., Godfrey, C., Khalil, H., McInerney, P., Soares, C., & Parker, D. (2017). 2017 guidance for the conduct of  
330 JBI scoping reviews. *Joana Briggs Inst Rev Man*, 13, 141-6.
- 331 9. Zhang, L. and Rangwala, H., 2018, June. Early identification of at-risk students using iterative logistic regression. In  
332 *International Conference on Artificial Intelligence in Education* (pp. 613-626). Springer, Cham.
- 333 10. Haddaway, N. R., Woodcock, P., Macura, B., & Collins, A. (2015). Making literature reviews more reliable through  
334 application of lessons from systematic reviews. *Conservation Biology*, 29(6), 1596-1605.
- 335 11. McManus, E.M., 2020. Reducing School Dropout Rates Through Early Identification of Students at Risk. *Emerging  
336 Perspectives: Interdisciplinary Graduate Research in Education and Psychology*, 4(2), pp.67-78.
- 337 12. Khalil, H., Peters, M.D.J., Tricco, A.C., Pollock, D. Alexander, L., McInerney, P., Godfrey, C.M. and Munn, Z. 2020.  
338 Conducting high quality scoping reviews - challenges and solutions. In the Elsevier *Journal of Clinical Epidemiology*.  
339 130 (2021) 156 - 160.
- 340 13. Horton, J., (2015). Identifying At-Risk Factors That Affect College Student Success. *International Journal of Process  
341 Education*, Volume 7, Issue 1.
- 342 14. Bakare, J., Omeje, H.O., Hisa, M.A., Orji, C.T., Onyechi, K.C.N., Eseadi, C., Nwajiuba, C.A., and Anyaegbunam, E.N.  
343 2019. Investigation of burn out syndrome among electrical and building technology undergraduate students in Nigeria.  
344 In *Medicine - clinical trials and experimental study*.98:42 (e17581).
- 345 15. Tricco, A. C., Lillie, E., Zarin, W., O'Brien, K. K., Colquhoun, H., Levac, D., ... & Straus, S. E. (2018). PRISMA  
346 extension for scoping reviews (PRISMA-ScR): checklist and explanation. *Annals of internal medicine*, 169(7),467-473.
- 347 16. Westgate, M. J. (2019). revtools: An R package to support article screening for evidence synthesis. *Research synthesis  
348 methods*, 10(4), 606-614. doi: <https://doi.org/10.1101/26288>
- 349 17. Russell, J., Smith, A. & Larsen, R. (2020). Elements of Success: Supporting at-risk student resilience through learning  
350 analytics. In the elsevier journal of *Computers and Education*. Vol (152).
- 351 18. Larose, S, & Tarabulsky, G. M., (2014). Academically at-risk students. In book: *Handbook of Youth Mentoring 2<sup>nd</sup>  
352 Edition*, Sage Publishers.
- 353 19. Joana R. C., Gomes, C.M.A., Bernardo, A.B., Núñez, J.C. Almeida, L.S. (2021). Dimensionality and reliability of a  
354 screening instrument for students at-risk of dropping out from Higher Education. In the elsevier journal of *studies in  
355 educational evaluation*. Vol (68).
- 356 21. Owen H.T.L., Huang, A.Y.Q., Yang, S.J.H. (2021). Impact of teachers’ grading policy on the identification of at-risk  
357 students in learning analytics. In the elsevier journal of *Computers and Education*. Vol (163).
- 358 22. Mashiloane, M. & Mchunu, M. (2013). Mining for Marks: A Comparison of Classification Algorithms when Predicting  
359 Academic Performance to Identify “Students at Risk”. *LNAI 8284*, pp. 541–552, 2013. Springer International  
360 Publishing Switzerland
- 361 23. Al-Shabandar, R., Hussain, A. J., Liatsis, P., & Keight, R. (2018). Detecting At-Risk Students with Early Interventions  
362 Using Machine Learning Techniques. DOI 10.1109/ACCESS.2019.2943351, IEEE Access.
- 363 24. Newton, P. & Burgess, D. (2016). *The Best Available Evidence: Decision Making for Educational Improvement*.

- 364 Springer 2016. DOI: 10.1007/978-94-6300-438-1, ISBN: 978-94-6300-438-1
- 365 25. Garard, D., (1995). Defining the At-Risk Student: Conceptual and Theoretical Considerations. Annual Meeting of the  
366 Speech Communication Association (81<sup>st</sup>, San Antonio, TX, November 18-21, 1995). ERIC.  
367 <https://eric.ed.gov/?id=ED391194>
- 368 26. Lim, C. P., Wang, P., & Graham, C. (2019). Driving, sustaining and scaling up blended learning practices in higher  
369 education institutions: a proposed framework. *Innovation and Education*. (2019) 1:1, [https://doi.org/10.1186/s42862-](https://doi.org/10.1186/s42862-019-0002-0)  
370 [019-0002-0](https://doi.org/10.1186/s42862-019-0002-0).
- 371 27. Wilton, M., Gonzalez-Niño, E., McPartlan, P., Turner, Z., Christoffersen, R. E., & Rothman, J. H. (2019). Improving  
372 Academic Performance, Belonging, and Retention through Increasing Structure of an Introductory Biology Course.  
373 *CBE - Life Sciences Education*. Vol. 18 no. 4. <https://doi.org/10.1187/cbe.18-08-0155>.
- 374 28. Grames, E. M., Stillman, A. N., Tingley, M. W., & Elphick, C. S. (2019). An automated approach to identifying search  
375 terms for systematic reviews using keyword co-occurrence networks. *Methods in Ecology and Evolution*. British  
376 Ecological Society, Vol. 10, Issue 10. <https://doi.org/10.1111/2041-210X.13268>.
- 377 29. Bunn, M., Bennett, A. & Burke, P. J. (2014). In the anytime: Flexible time structures, student experience and temporal  
378 equity in higher education. *Time & Society* 28(5):0961463X1878764.
- 379 30. Berka, P & Marek, L., (2021) Bachelor's degree student dropouts: Who tend to stay and who tend to leave?, *Studies in*  
380 *Educational Evaluation*, Volume 70, 2021, 100999, ISSN 0191-491X, <https://doi.org/10.1016/j.stueduc.2021.100999>.  
381 (<https://www.sciencedirect.com/science/article/pii/S0191491X21000250>)
- 382 31. Peters, M., Godfrey, C., Khalil, H., McInerney, P., Soares, C., & Parker, D. (2015). 2015 Methodology for JBI Scoping  
383 JBI scoping reviews. The Joanna Briggs Institute Reviewers' Manual 2015 Edition, The Joanna Briggs Institute.
- 384 32. Snilstveit, B., Vojtkova, M., Bhavsar, A., Gaarder, M. (2013). Evidence Gap Maps: A Tool for Promoting Evidence-  
385 Informed Policy and Prioritizing Future Research. Policy Research Working paper 6725, The World Bank, Independent  
386 Evaluation Group. December 2013.
- 387 33. Jayaprakash, S. M., Moody, E. W., Lauría, E. J. M, Regan, J. R., & Baron, J. D., (2014). Early Alert of Academically  
388 At- Risk Students: An Open Source Analytics Initiative, *Journal of Learning Analytics*.
- 389 34. Shafait, Z., Khan, M. A., Sahibzada, U. F., Dacko-Pikiewicz, Z., Popp, J. (2021). An assessment of students' emotional  
390 intelligence, learning outcomes, and academic efficacy: A correlational study in higher education. - *PLoS ONE* 16(8):  
391 e0255428. <https://doi.org/10.1371/journal.pone.0255428>.
- 392 35. Chong, A. M., Lee, P. G., Roslan, S., Baba, M. (2015). Emotional Intelligence and at Risk Students. Sage Open, January  
393 - March 2015; 1-8.
- 394 36. Jelena, J., Mohammed, S., Srecko, J., Dragan, G. (2021). Students matter the most in learning analytics: The effects of  
395 internal and instructional conditions in predicting academic success. *Computers & Education* 172(2021) 104251.
- 396 37. Sarra, A., Fontanella, L. & Di Zio, S. (2019). Identifying Students at Risk of Academic Failure Within the Educational  
397 Data Mining Framework. *Soc Indic Res* 146, 41–60 (2019). <https://doi.org/10.1007/s11205-018-1901-8>
- 398 38. Delmas, P. M., & Childs, T. N. (2021) Increasing faculty engagement in the early alert process, *Innovations in*  
399 *Education and Teaching International*, 58:3, 283-293, DOI: 10.1080/14703297.2020.1740102
- 400 39. Brannagan, K. B., Dellinger, A., Thomas, J., Mitchell, D., Lewis-Trabeaux, S. & Dupre S. Impact of peer teaching on  
401 nursing students: perceptions of learning environment, self-efficacy, and knowledge. *Nurse Educ Today*. 2013  
402 Nov;33(11):1440-7. doi: 10.1016/j.nedt.2012.11.018. Epub 2012 Dec 20. PMID: 23260616.
- 403 40. Kim, S. C., Jillapali, R., Boyd, S. (2021). Impacts of peer tutoring on academic performance of first-year baccalaureate  
404 nursing students: A quasi-experimental study, *Nurse Education Today*, Volume 96, 2021, 104658, ISSN 0260-6917,  
405 <https://doi.org/10.1016/j.nedt.2020.104658>.
- 406 41. Zhuhadar, L., Daday, L., Marklin, S., Kessler, B., Helbig, T.(2019). Using survival analysis to discovering pathways  
407 to success in mathematics, *Computers in Human Behavior*, Volume 92, Pages 487-495, ISSN 0747-5632,  
408 <https://doi.org/10.1016/j.chb.2017.12.016>.
- 409 42. Paura, L., & Arhipova, I. (2014). Cause analysis of students' dropout rate in higher education study program. *Procedia-*  
410 *Social and Behavioral Sciences*, 109, 1282-1286.
- 411 43. Masserini, L., & Bini, M. (2021). Does joining social media groups help to reduce students' dropout within the first  
412 university year?. *Socio-Economic Planning Sciences*, 73, 100865.
- 413 44. van der Zanden, P. J. C., Denessen, E., Cillessen, A. H. N., Meijer, P. C. (2018). Domains and predictors of first-year  
414 student success: A systematic review, *Educational Research Review*, Volume 23, 2018, Pages 57-77, ISSN 1747-938X,  
415 <https://doi.org/10.1016/j.edurev.2018.01.001>.
